# Supplementary material
Source: publisher figshare collection journal article supplement (https://acs.figshare.com/ndownloader/files/15461996)
Supplement: Supplementary file 1 [file 15461996]

**Supporting Information for**

**Covalent Labeling with Diethylpyrocarbonate is Sensitive to Residue  
Microenvironment, Providing Improved Analysis of Protein Higher Order  
Structure by Mass Spectrometry**

Patanachai Limpikirati, Xiao Pan, and Richard W. Vachet\*

Department of Chemistry, University of Massachusetts Amherst, Amherst, Massachusetts 01003,  
United States

\* Corresponding author

**AUTHOR INFORMATION**

Patanachai Limpikirati: [plimpikirati@umass.edu](mailto:plimpikirati@umass.edu)

Xiao Pan: [xpan@umass.edu](mailto:xpan@umass.edu)

Richard W. Vachet: [rwvachet@chem.umass.edu](mailto:rwvachet@chem.umass.edu)

## CONTENT

| <b>Material</b>                                                                                                                                                        | <b>Page</b> |
|------------------------------------------------------------------------------------------------------------------------------------------------------------------------|-------------|
| <b>Supplemental Experimental Section</b>                                                                                                                               |             |
| <b>A.</b> Materials                                                                                                                                                    | S-3         |
| <b>B.</b> DEPC labeling and LC-MS/MS analyses of model peptides                                                                                                        | S-3         |
| <b>C.</b> LC-MS/MS analyses of protein digests                                                                                                                         | S-5         |
| <b>D.</b> Determination of modification percentages                                                                                                                    | S-5         |
| <b>E.</b> Solvent accessible surface area (SASA) calculations                                                                                                          | S-6         |
| <b>Supplemental Schemes</b>                                                                                                                                            |             |
| - <b>Scheme S1.</b> DEPC labeling reactions of Cys, His, Lys, Tyr, Ser, and Thr                                                                                        | S-7         |
| - <b>Scheme S2.</b> Acetylation reaction of peptide N-terminus                                                                                                         | S-7         |
| - <b>Scheme S3.</b> Molecular schemes showing how both positively-charged and negatively-charged residues could affect Ser, Thr, and Tyr                               | S-14        |
| <b>Supplemental Figures</b>                                                                                                                                            |             |
| - <b>Figure S1.</b> Illustration of how the DEPC modification levels are calculated                                                                                    | S-8         |
| - <b>Figure S2.</b> DEPC labeling of model peptides (DEPC:peptide molar ratio of 5:1)                                                                                  | S-9         |
| - <b>Figure S3.</b> DEPC labeling of model peptides (DEPC:peptide molar ratio of 50:1)                                                                                 | S-10        |
| - <b>Figure S4.</b> DEPC labeling of bradykinin and preproenkephalin peptides                                                                                          | S-11        |
| - <b>Figure S5.</b> MS/MS assignments for weakly nucleophilic residues that are modified at peptide level                                                              | S-12        |
| - <b>Figure S6.</b> Flow chart summarizing the covalent labeling results and the structural features of weakly nucleophilic residues in $\beta$ 2m, ubiquitin, and hGH | S-13        |
| <b>Supplemental Tables</b>                                                                                                                                             |             |
| - <b>Table S1.</b> Summary of DEPC modification percentages and structural features for nucleophilic residues in $\beta$ 2m (PDB 1JNJ <sup>1</sup> )                   | S-15        |
| - <b>Table S2.</b> Summary of DEPC modification percentages and structural features for nucleophilic residues in ubiquitin (PDB 1UBQ <sup>2</sup> )                    | S-19        |
| - <b>Table S3.</b> Summary of DEPC modification percentages and structural features for nucleophilic residues in hGH (PDB 1HGU <sup>3</sup> )                          | S-21        |
| <b>Supplemental References</b>                                                                                                                                         | S-25        |

## SUPPLEMENTAL EXPERIMENTAL SECTION

### A. Materials

Human full-length beta-2-microglobulin ( $\beta 2m$ ) (#126-11) and recombinant human growth hormone (hGH) (#4769) were obtained from Lee Biosolutions (Maryland Heights, MO) and BioVision (Milpitas, CA), respectively. Bovine ubiquitin (#U6253), bradykinin (#B3259), diethylpyrocarbonate (DEPC) (#D5758), imidazole (#I5513), iodoacetamide (#I6125), tris(2-carboxyethyl)phosphine (TCEP) (#C4706), 3-morpholinopropane-1-sulfonic acid (MOPS) (#M1254), and MOPS sodium salt (#M9381) were all purchased from Sigma-Aldrich (St. Louis, MO). Preproenkephalin was ordered from American Peptide Company (Sunnyvale, CA). Model peptides (Fmoc-DGXGG-amide, where X = H, K, Y, S, or T) were custom synthesized by GenScript USA Inc (Piscataway, NJ). Pierce<sup>TM</sup> sulfo-NHS-Acetate (#26777) was obtained from Thermo Scientific (Waltham, MA). Sodium phosphate monobasic monohydrate (#S0710) was purchased from EM Science (Darmstadt, Hesse, Germany). Sodium phosphate dibasic anhydrous (#S374), N,N-Dimethylformamide (#D119), formic acid (#A117), acetonitrile (#A998), and water (#W7) were obtained from Fisher Scientific (Fair Lawn, NJ). Immobilized trypsin (#EN-251) and chymotrypsin (#EN-261) were purchased from Princeton Separations (Adelphia, NJ). Amicon® centrifugal filters (#UFC5010 and #UFC5003) were bought from EMD Millipore (Burlington, MA). All reagents used in this study have no known potential hazards.

### B. DEPC Labeling and LC-MS/MS Analyses of Model Peptides

**DEPC Labeling Reactions.** A lyophilized powder of model peptide (Fmoc-DGXGG-amide, where X = H, K, Y, S, or T) was first reconstituted in water (His and Lys) or dimethylformamide (Ser, Thr, and Tyr), and the resulting solution of peptide was then diluted in 10 mM MOPS buffer (pH 7.4) to make a final solution. Each model peptide (50  $\mu$ M) was reacted with DEPC at 37 °C for 5 min at a DEPC to protein molar ratio of 5 to 1 (His, Lys, and Tyr) or 50 to 1 (Ser and Thr). The reaction was then quenched by the addition of imidazole at a 1:50 DEPC to imidazole molar ratio.

Bradykinin and preproenkephalin peptides were reconstituted in water. A peptide mixture was prepared in 10 mM MOPS buffer (pH 7.4) containing 10  $\mu$ M of each peptide. The N-termini

of the peptides were acetylated before labeling them with DEPC. The N-terminal blocking was initiated by adding sulfo-NHS-acetate in a molar excess of 600, and the solution was reacted for 1 h at room temperature. Subsequently, the peptide mixture was reacted with DEPC at 37 °C for 5 min at a molar excess of 50. The reaction was then quenched by the addition of imidazole.

**Liquid Chromatography (LC).** Following quenching online LC-MS/MS analyses were conducted on a Thermo Scientific Ultimate 3000 HPLC (Waltham, MA). LC separation was performed on a Thermo Scientific Acclaim™ PepMap™ RSLC C18 column (15 cm x 300 μm, 2 μm particle size). LC/MS-grade water (solvent A) and acetonitrile (solvent B), each containing 0.1% formic acid, were used as mobile phases. A flow rate of 4 μL/min was used, and 1 μL of sample was first loaded and desalted at 5%B during the first 5 min. An isocratic elution mode at 40%B over 15 min was then applied to separate unmodified and modified peptides.

For a mixture of bradykinin and preproenkephalin peptides, 5 μL of sample was first loaded and desalted during the first 5 min. After that a linear gradient was increased from 5%B to 50%B over 50 min to separate unmodified and modified peptides.

**Mass Spectrometry (MS).** Mass spectra from the online LC-MS/MS were acquired on a Bruker AmaZon quadrupole ion trap (Billerica, MA). The electrospray needle voltage was operated using a positive mode at ~4 kV, and the capillary temperature was set to 300 °C. Tandem spectra were collected for the top intense species with ion abundances above 1,000 from each mass spectrum. Collisional-induced dissociation (CID) was conducted with a ramp energy 60% to 180% of 1.5 V amplitude.

**Peptide Identification and Peak Quantification.** Bruker Compass™ Data Analysis software was used to reconstruct extracted ion chromatograms (XICs) of unmodified and modified peptides. Peptide identification and peak quantification were performed in a manual manner using tandem spectra and mass spectral peak areas, respectively. DEPC modification levels (%CL) of each labeled residue were calculated using Eq. S1 (see Section D. Determination of Modification Percentages).

### C. LC-MS/MS Analyses of Protein Digests

(Using a Thermo Scientific Dionex Ultimate 3000 HPLC and a Bruker AmaZon Quadrupole Ion Trap Mass Spectrometer)

**Liquid Chromatography (LC).** Chymotryptic digests obtained from the DEPC reactions on  $\beta$ 2m intact proteins were analyzed using a Thermo Scientific Dionex Ultimate 3000 HPLC (Waltham, MA). 5  $\mu$ L of sample was loaded and separation of peptides was performed on a Thermo Scientific Acclaim™ PepMap™ RSLC C18 column (15 cm x 300  $\mu$ m, 2  $\mu$ m particle size). A flow rate of 4  $\mu$ L/min was used, and desalting was performed at 5%B during the first 5 min after sample injection. A 50-min linear gradient was applied with %B increased from 5%B to 50%B to separate peptides. The gradient was finally elevated to and held at 95%B to flush a column.

**Mass Spectrometry (MS).** Mass spectra were acquired on a Bruker AmaZon quadrupole ion trap (Billerica, MA). The electrospray needle voltage was kept at ~4 kV (positive mode), and the capillary temperature was set to 300°C. The top intense peptides with ion abundances above 1,000 from each mass spectrum were selected for MS/MS acquisition. CID was conducted at 1.5 V amplitude with a ramp energy 60% to 180%. Because of the large number of measured peaks, active exclusion of 0.5 min was activated after 2 spectra were acquired for any given precursor ion.

**Peptide Identification and Peak Quantification.** See Section B.

### D. Determination of Modification Percentages

DEPC modification levels (%) of each labeled residue were calculated as follows (**Eq. S1**).

$$\% \text{ DEPC labeling} = \frac{\sum_{i=1}^n \sum_{z=1}^m A_{i,z}^{modi}}{\sum_{i=1}^n \sum_{z=1}^m A_{i,z}^{modi} + \sum_{i=1}^n \sum_{z=1}^m A_{i,z}^{unmodi}} \times 100 \quad (\text{Eq. S1})$$

where  $A_{i,z}^{unmodi}$  is the peak area of DEPC-unmodified peptide whose sequence (i) contains the residue of interest and possesses a certain charge state (z), and  $A_{i,z}^{modi}$  is the peak area of peptide in which the residue of interest is DEPC-modified. An illustration of this calculation can be found in **Figure S1**.

Note that DEPC modification percentages calculated by **Eq. S1** are only used for the relative quantitation, i.e. comparing the DEPC labeling at the same residue under different conditions (labeling on intact protein vs. protein digest). The modification levels do not reflect the absolute quantitation of modified species as the addition of a carbethoxyl group to the modified peptide and different LC solvent conditions during gradient elution of peptides result in different ionization efficiencies of the unmodified and modified peptides.

#### **E. Solvent Accessible Surface Area (SASA) calculation**

SASA of amino acid side chain was calculated from the Protein Data Bank (PDB) atomic coordinates using GETAREA 1.0 beta.<sup>4</sup> A probe radius of 1.4 Å which represents the van der Waals sphere of water was used in a calculation. Atomic coordinates of the 3D structures of  $\beta$ 2m (PDB ID: 1JNJ),<sup>1</sup> ubiquitin (PDB ID: 1UBQ),<sup>2</sup> and hGH (PDB ID: 1HGU)<sup>3</sup> were submitted to calculate individual side-chain SASA. Note that human and bovine ubiquitin have the same amino acid sequence. Even though bovine ubiquitin was used in experiments, the SASA and structural features considered in this study were obtained from the PDB structure of human ubiquitin (PDB ID: 1UBQ). The calculated SASA was compared to the surface area of the side chain in a Gly-X-Gly tripeptide, where X is a side chain of interest, to generate a percent ratio (%SASA).

## SUPPLEMENTAL SCHEMES, FIGURES, AND TABLES

**Scheme S1.** DEPC labeling reactions of Cys, His, Lys, Tyr, Ser, and Thr

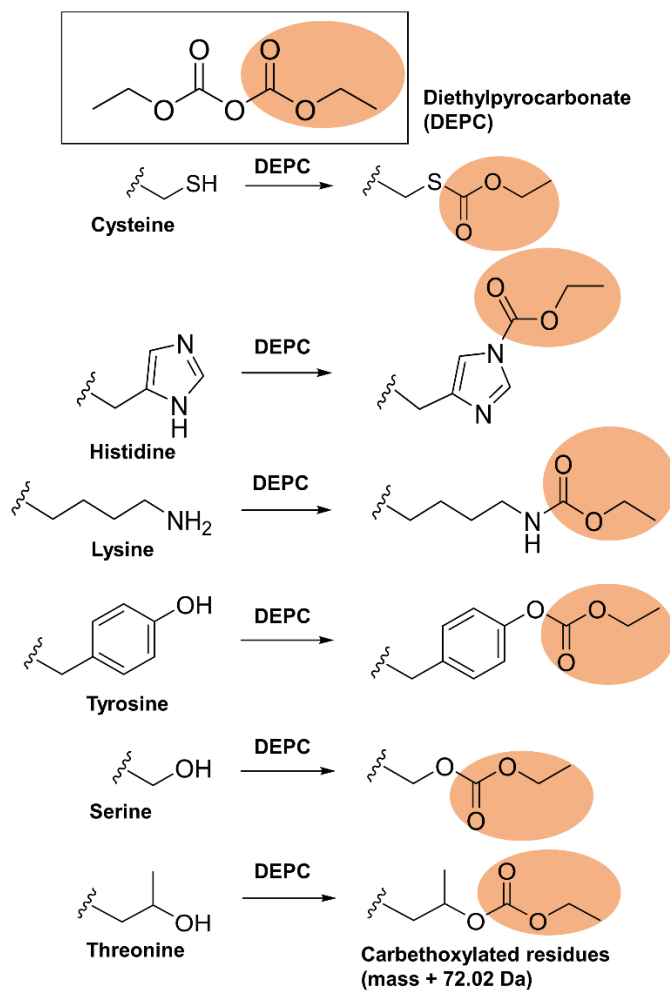

**Scheme S2.** Acetylation reaction of peptide N-terminus

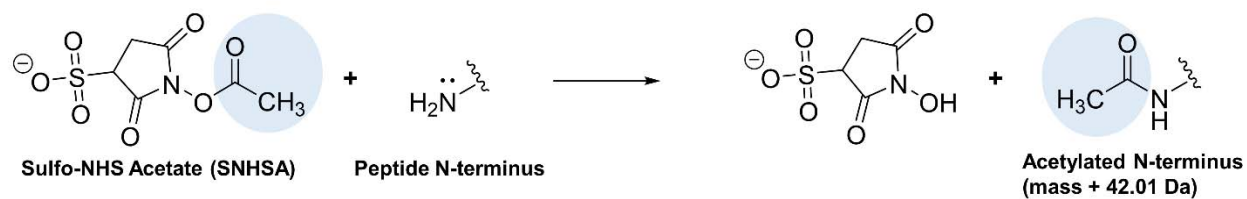

**(a) Total ion chromatogram (TIC)**

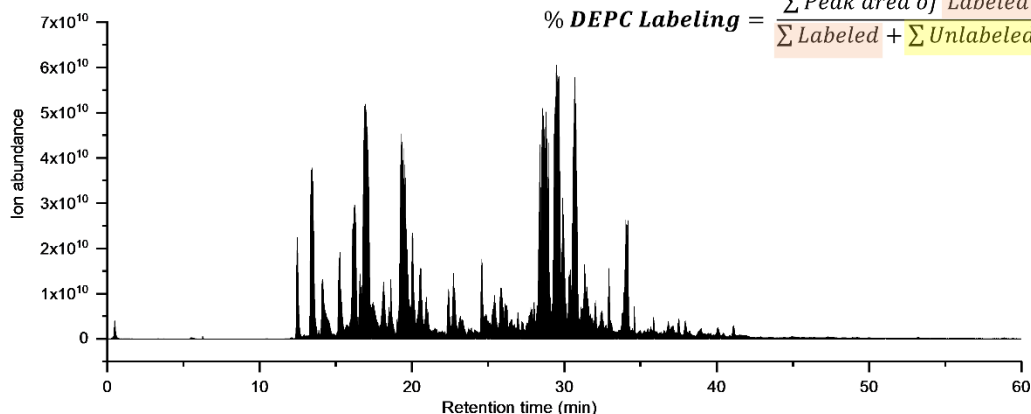

$$\% \text{ DEPC Labeling} = \frac{\sum \text{Peak area of Labeled}}{\sum \text{Labeled} + \sum \text{Unlabeled}} \times 100$$

**(b) Extracted ion chromatogram (XIC):  
Unmodified peptide**

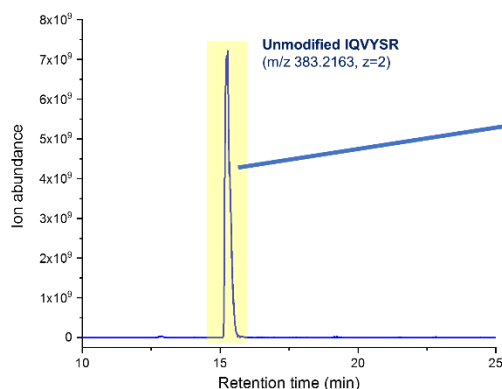

**(d) CID MS/MS:  $\beta$ 2m (7-12) IQVYSR**

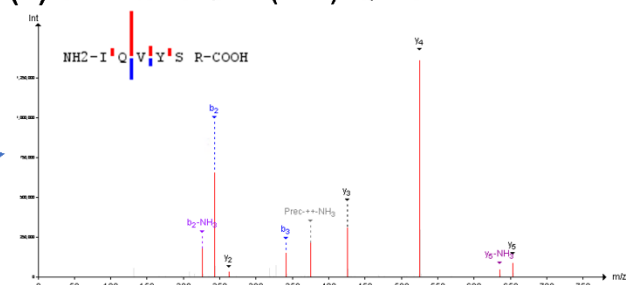

**(c) XIC: DEPC-modified peptides**

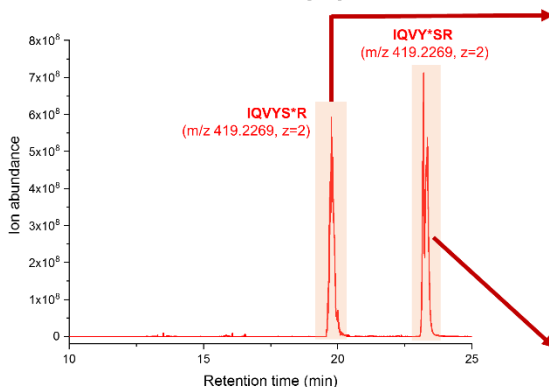

**(e) CID MS/MS:  $\beta$ 2m (7-12) IQVYSR**

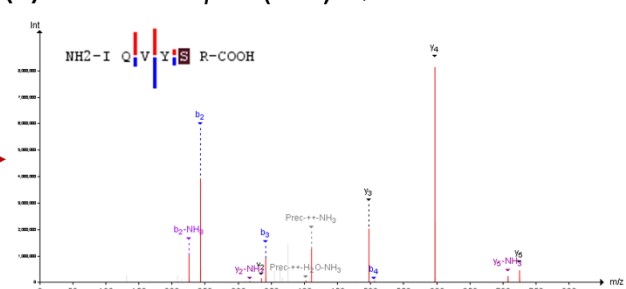

**(f) CID MS/MS:  $\beta$ 2m (7-12) IQVYSR**

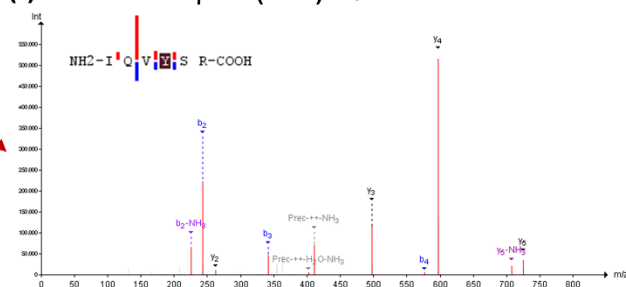

**Figure S1.** Illustration of how the DEPC modification levels are calculated. After DEPC labeling and proteolytic digestion, (a) LC-MS analysis of the digested protein is performed. Peak areas of (b) unlabeled and (c) labeled peptides in a chromatogram are used to calculate the labeling percentage. During LC-MS, peptides are subjected to CID MS/MS. Tandem mass spectra of (d) unlabeled and (e) & (f) labeled peptides obtained at specific retention time are used for peptide sequencing and/or identification of DEPC labeled site.



## DEPC Labeling Reactivity of Weakly Nucleophilic Residues

### (a) Tyr

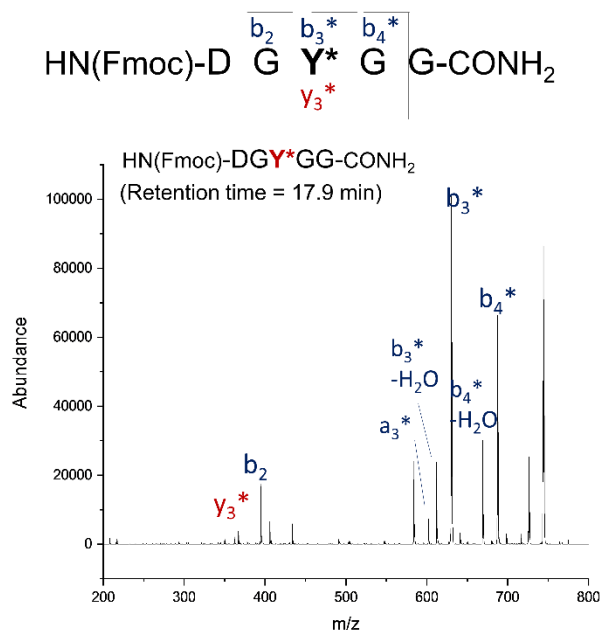

### (b) His

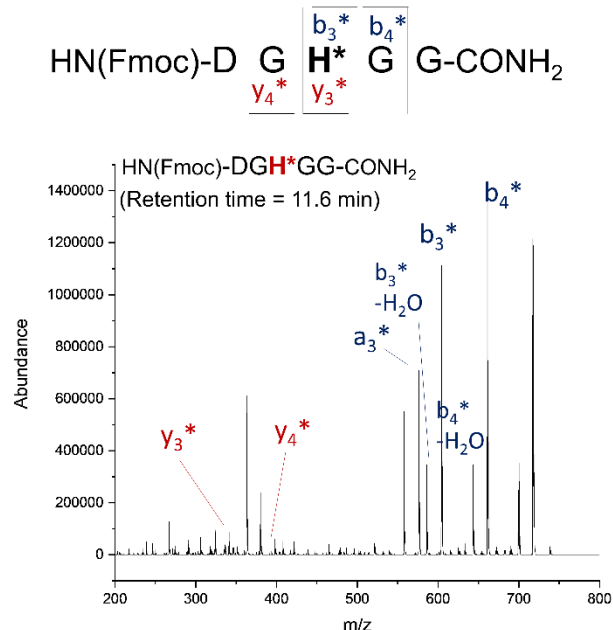

### (c) Lys

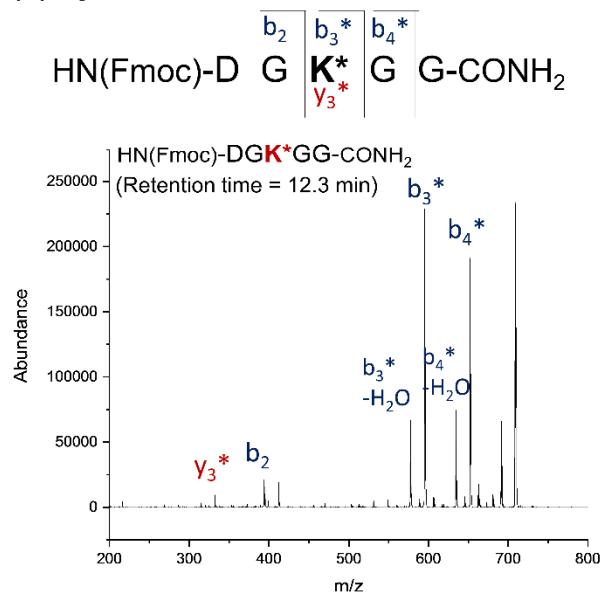

**Figure S2.** DEPC labeling of model peptides. MS/MS assignments for nucleophilic residues that are modified in model peptides Fmoc-DGXGG-amide, where X is a DEPC modifiable residue (a) Tyr, (b) His, or (c) Lys, after allowing the peptide to react with DEPC at a molar ratio of 5:1 (DEPC:peptide).

(a) Ser

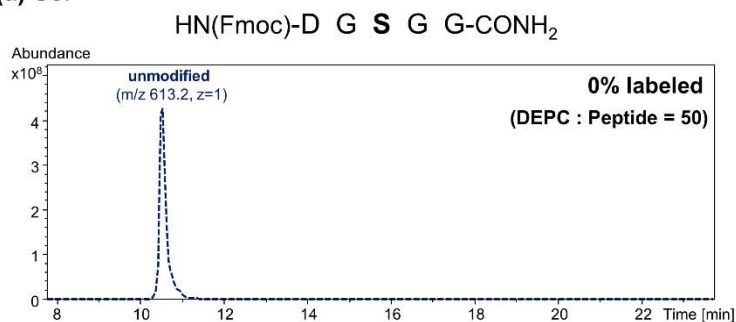

(b) Thr

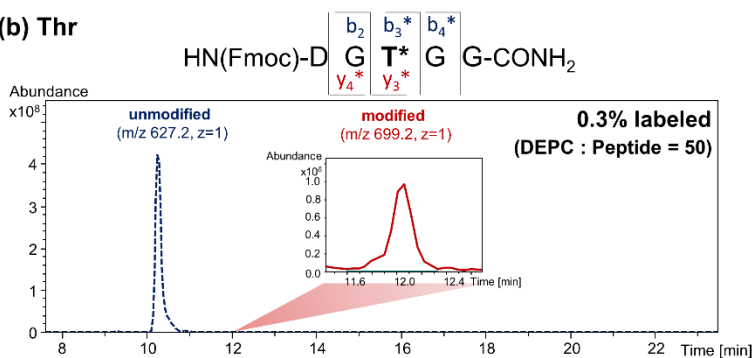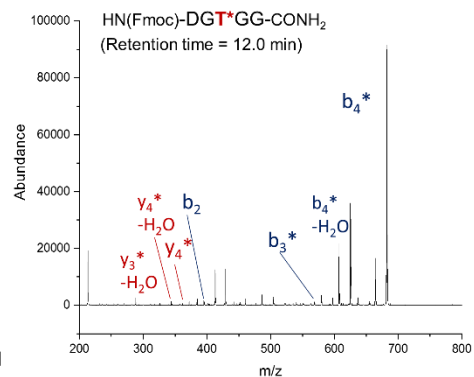

**Figure S3.** DEPC labeling of model peptides. Extracted ion chromatograms (XICs, left) of the +1 ions of the unmodified and DEPC-modified peptides Fmoc-DGXGG-amide, where X is a DEPC modifiable (a) Ser or (b) Thr, after allowing the peptide to react with DEPC at a DEPC:peptide molar ratio of 50:1. Modification percentages are calculated from peak areas in XIC. Tandem mass spectra (right) are used to confirm the site of modification. MS/MS assignment of the modified peptide is shown above the XICs.

**(a) Acetylated bradykinin**

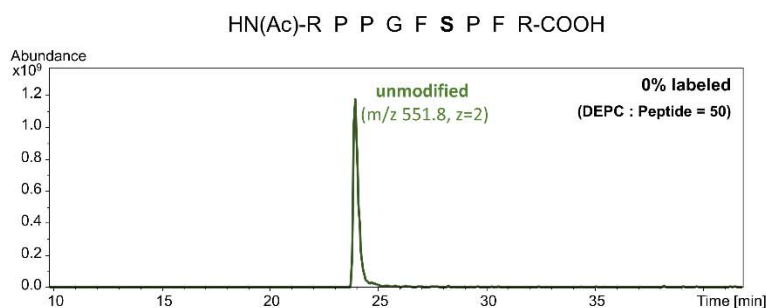

**(b) Doubly-acetylated preproenkephalin**

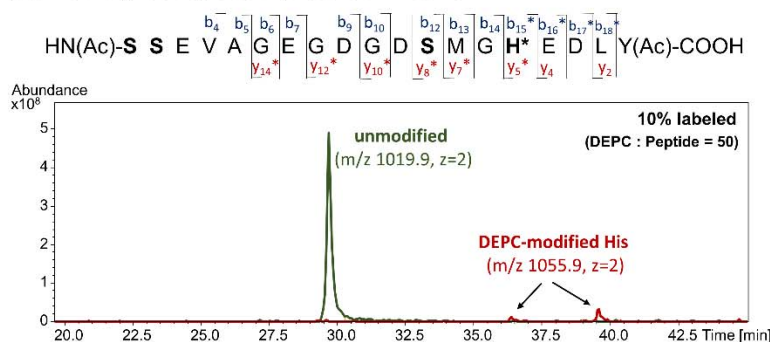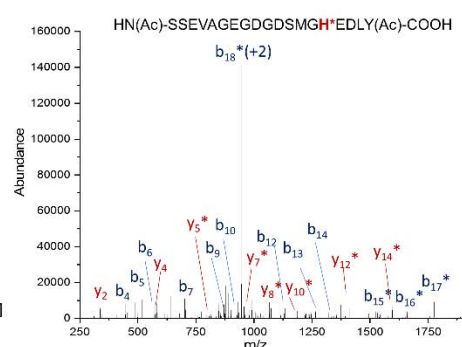

**(c) Acetylated preproenkephalin**

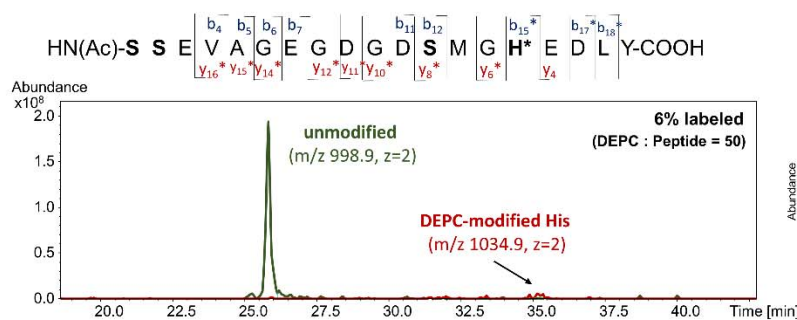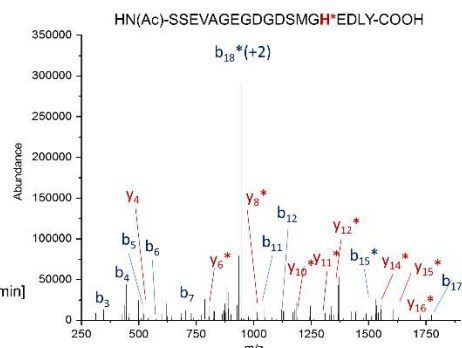

**Figure S4.** DEPC labeling of bradykinin and preproenkephalin peptides. Extracted ion chromatograms (XICs, left) of the +2 ions of the unmodified and DEPC-modified versions of the N-terminally blocked peptides (a) bradykinin, (b) & (c) preproenkephalin, after reacting the peptide mixture with DEPC at a DEPC to peptide molar ratio of 50 to 1. Tyr and Ser residues in these peptides are unreactive with DEPC even when the other reactive site (N-terminus) are blocked via acetylation with sulfo-NHS-acetate in these peptides (**Scheme S2**). Tandem mass spectra (right) were used to confirm the site of modification. MS/MS assignments of the modified peptides are shown above the XICs.

## Influence of Higher-Order Structure on the Covalent Labeling Based Structural Analysis of Proteins and Identifying Structural Features that Tune the Reactivity of Weak Nucleophiles

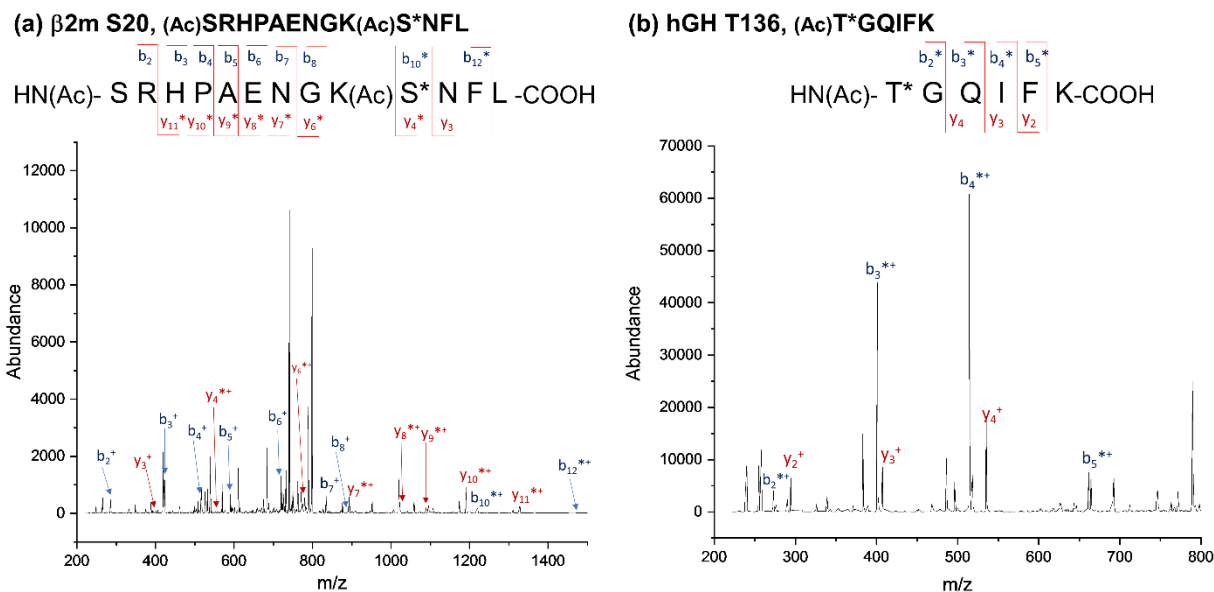

**Figure S5.** MS/MS assignments for weakly nucleophilic residues that are modified at peptide level. When reacting the N-terminally blocked peptides at DEPC to peptide molar ratios of 4 to 1 or 5 to 1, the reactivity of the Ser, Thr, and Tyr residues in free peptides are found to be lower than in the intact proteins. Only two residues in three model proteins are found to be modified. This Figure S-shows tandem mass spectra acquired after CID of (a) HN(Ac)-SRHPAENGK(Ac)S\*NFL-COOH peptide from chymotryptic digest of  $\beta$ -2-microglobulin ( $\beta 2m$ ), where Ser20 is the DEPC modification site, and (b) HN(Ac)-T\*GQIFK-COOH peptide from tryptic digest of human growth hormone (hGH), where Thr136 is the modification site. Product ions with DEPC-modified residue have mass addition of 72.02 Da while acetylated N-terminus or Lys contributes to mass addition of 42.01 Da.

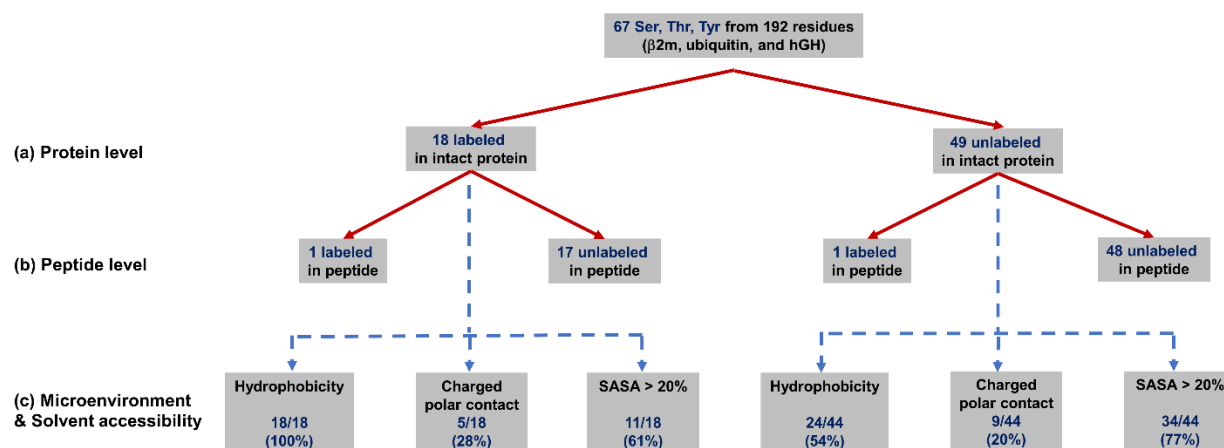

**Figure S6.** Flow chart summarizing the covalent labeling results and the structural features of weakly nucleophilic residues in β2m, ubiquitin, and hGH. The numbers of these residues that are found to be labeled or unlabeled in (a) intact proteins and (b) peptide fragments are shown in the chart. Structural features that could affect the labeling reactivity of these residues, such as the presence of nearby hydrophobic residues or charged residues and the solvent accessible surface area (SASA) above 20%, are indicated in (c). The fraction of labeled or unlabeled residues that have each specific structural feature is shown in the chart. For the unlabeled Ser, Thr, and Tyr residues, structural features are investigated for 44 out of 49 residues as 5 of the residues in hGH are not resolved in the crystal structure (PDB ID: 1HGU).<sup>3</sup>

**Scheme S3.** Molecular schemes showing how both positively-charged and negatively-charged residues could affect Ser, Thr, and Tyr. (a) Deprotonated forms of these weak nucleophiles can presumably be stabilized by nearby positively-charged residues (Arg, Lys), increasing their nucleophilicity, and (b) the hydroxyl group of Ser, Thr, and Tyr side chains can form an ionic hydrogen bond with nearby negatively-charged residues (Asp, Glu), which might also increase their nucleophilicity.

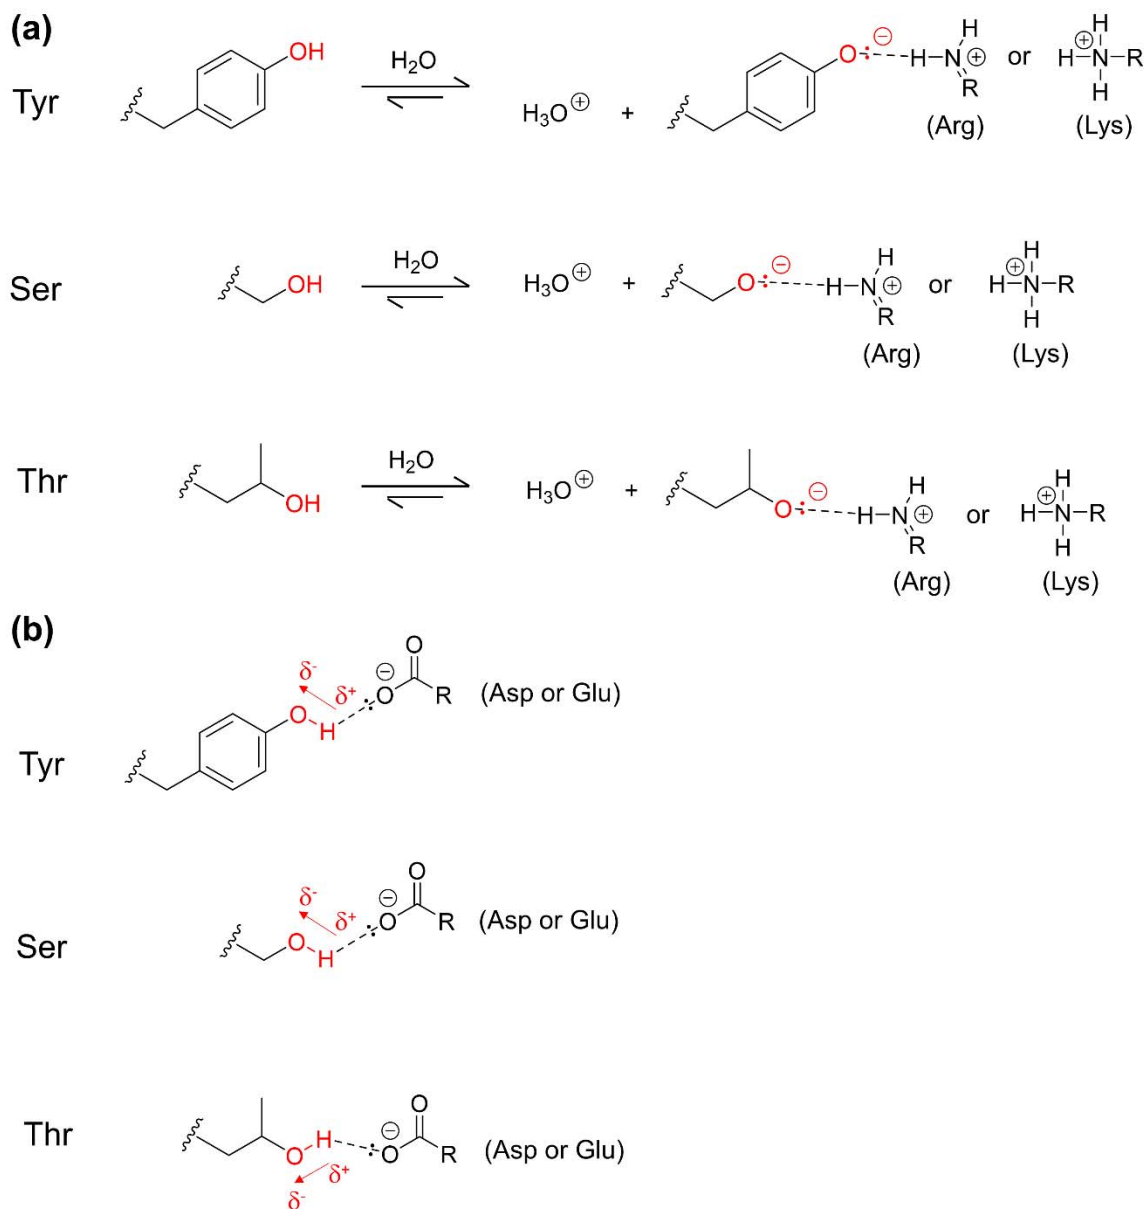

**Table S1.** DEPC modification percentages of nucleophilic residues in  $\beta$ 2m intact protein and its proteolytic peptides. Each experiment was performed in triplicate or quadruplicate (n = 3 or 4). Error bars shown in a table are standard deviations. Listed along are structural features of each residue from PDB 1JNJ. ✓ and ✗ represent presence or absence of each structural element, respectively. (+) and (-) represent positively charged and negatively charged polar contacts, respectively.

| $\beta$ 2m residue | Secondary structure | pK <sub>a</sub> <sup>†</sup> | Solvent accessibility* |       | Microenvironment                                                                                                                                                                                |                                       | % DEPC CL                           |                              |                               |
|--------------------|---------------------|------------------------------|------------------------|-------|-------------------------------------------------------------------------------------------------------------------------------------------------------------------------------------------------|---------------------------------------|-------------------------------------|------------------------------|-------------------------------|
|                    |                     |                              | %SASA ratio            | > 20% | Charged polar contact [within 4 Å]                                                                                                                                                              | Hydrophobic neighbor [within 6 Å]     | Intact protein (DEPC:protein = 4:1) | Peptide (DEPC:peptide = 4:1) | Peptide (DEPC:peptide = 50:1) |
| <b>T4</b>          | Random coil         | N/A <sup>a</sup>             | 81.5                   | ✓     | ✗<br>- Overall: Uncharged, nothing                                                                                                                                                              | ✓<br>- OH close to P5, L87            | 59 ± 5<br>(T4 & N-term)             | N.D. <sup>c</sup>            | 0.02 ± 0.01                   |
| <b>K6</b>          | β-sheet             | 10.42                        | 79.6                   | ✓     | ✗<br>- H-bonding with backbone CO of D8<br>- Overall: Uncharged, polar contact                                                                                                                  | ✗                                     | 41 ± 5                              | N/A <sup>b</sup>             | N/A                           |
| <b>Y10</b>         | β-sheet             | 10.98                        | 41.6                   | ✓     | ✗<br>- H-bonding with side chain CONH <sub>2</sub> of N24<br>- Overall: Uncharged, polar contact                                                                                                | ✓<br>- OH close to Y26, L65           | 15 ± 2                              | N.D.                         | 3.9 ± 0.8                     |
| <b>S11</b>         | β-sheet             | N/A                          | 10.3                   | ✗     | ✗<br>- H-bonding with side chain aromatic amine of W95<br>- H-bonding with backbone CO of F22, R97, M99<br>- H-bonding with backbone NH of R12, D98, M99<br>- Overall: Uncharged, polar contact | ✓<br>- OH close to A15, L23, F70, M99 | 3.0 ± 0.5                           | N.D.                         | 0.02 ± 0.01                   |
| <b>H13</b>         | Random coil         | 6.09                         | 47.7                   | ✓     | ✗<br>- Overall: Uncharged, nothing                                                                                                                                                              | ✓<br>- imidazole amine close to F22   | 30 ± 3                              | N/A                          | N/A                           |
| <b>K19</b>         | Random coil         | 10.42                        | 77.7                   | ✓     | ✓<br>- Salt bridge with side chain COOH of E16<br>- H-bonding with backbone CO of S20, N21<br>- Overall: Charged, (-)                                                                           | ✗                                     | 30 ± 2                              | N/A                          | N/A                           |
| <b>S20</b>         | Random coil         | N/A                          | 61.6                   | ✓     | ✓<br>- H-bonding with side chain OH of T71<br>- H-bonding with backbone CO of E69<br>- H-bonding with side chain COOH of E69<br>- Overall: Charged, (-)                                         | ✗                                     | N.D.                                | 2.6 ± 0.6                    | N.D.                          |

<sup>a</sup> N/A = not applicable; <sup>b</sup> N-terminal blocking using SNHSA also results in side reaction (acetylation) at Lys and His residues in free peptides, so they are not discussed here.

<sup>c</sup> N.D. = not detected (less than DEPC labeling threshold of 0.01%<sup>5</sup>)

\* SASA calculated using GETAREA<sup>4</sup>, as explained in detail in the Supplemental Experimental Section; <sup>†</sup> pK<sub>a</sub> calculated using PROPKA<sup>6</sup>

| $\beta$ 2m residue | Secondary structure | pK <sub>a</sub> | Solvent accessibility |       | Microenvironment                                                                                                                                                                |                                     | % DEPC CL                           |                              |                               |
|--------------------|---------------------|-----------------|-----------------------|-------|---------------------------------------------------------------------------------------------------------------------------------------------------------------------------------|-------------------------------------|-------------------------------------|------------------------------|-------------------------------|
|                    |                     |                 | %SASA ratio           | > 20% | Charged polar contact [within 4 Å]                                                                                                                                              | Hydrophobic neighbor [within 6 Å]   | Intact protein (DEPC:protein = 4:1) | Peptide (DEPC:peptide = 4:1) | Peptide (DEPC:peptide = 50:1) |
| Y26                | $\beta$ -sheet      | 10.20           | 26.4                  | ✓     | ✗<br>- Overall: Uncharged, nothing                                                                                                                                              | ✓<br>- OH close to L65              | N.D.                                | N.D.                         | N.D.                          |
| S28                | $\beta$ -sheet      | N/A             | 18.2                  | ✗     | ✗<br>- H-bonding with side chain CONH <sub>2</sub> of Q8<br>- H-bonding with side chain OH of Y26<br>- H-bonding with backbone NH of G29<br>- Overall: Uncharged, polar contact | ✓<br>- OH close to Y26              | N.D.                                | N.D.                         | N.D.                          |
| H31                | Random coil         | 5.98            | 33.5                  | ✓     | ✗<br>- Overall: Uncharged, nothing                                                                                                                                              | ✓<br>- imidazole amine close to I1  | 5 ± 3                               | N/A                          | N/A                           |
| S33                | Random coil         | N/A             | 70.1                  | ✓     | ✗<br>- Overall: Uncharged, nothing                                                                                                                                              | ✓<br>- OH close to P32, F62         | 1.6 ± 0.4                           | N.D.                         | N.D.                          |
| K41                | Random coil         | 12.73           | 12.4                  | ✗     | ✓<br>- Salt bridge with side chain COOH of E44, D76<br>- H-bonding with side chain OH of Y78<br>- H-bonding with backbone CO of E44<br>- Overall: Charged, (-)                  | ✓<br>- NH <sub>2</sub> close to I46 | 1.7 ± 0.8                           | N/A                          | N/A                           |
| K48                | Random coil         | 10.62           | 87.0                  | ✓     | ✓<br>- Salt bridge with side chain COOH of E47<br>- Overall: Charged, (-)                                                                                                       | ✗                                   | 5 ± 2                               | N/A                          | N/A                           |
| H51                | Random coil         | 7.15            | 57.5                  | ✓     | ✓<br>- Salt bridge with side chain COOH of D53<br>- H-bonding with backbone NH of D53<br>- Overall: Charged, (-)                                                                | ✓<br>- imidazole amine close to L64 | 4 ± 1                               | N/A                          | N/A                           |
| S52                | Random coil         | N/A             | 50.7                  | ✓     | ✗<br>- H-bonding with side chain OH of Y67<br>- H-bonding with backbone CO of D53, L65<br>- H-bonding with backbone NH of D53, L65<br>- Overall: Uncharged, polar contact       | ✓<br>- OH close to L65, Y67         | N.D.                                | N.D.                         | N.D.                          |
| S55                | Random coil         | N/A             | 55.3                  | ✓     | ✗<br>- H-bonding with backbone CO of S57<br>- Overall: Uncharged, polar contact                                                                                                 | ✓<br>- OH close to L54              | 0.6 ± 0.3                           | N.D.                         | N.D.                          |



| $\beta$ 2m residue | Secondary structure | pK <sub>a</sub> | Solvent accessibility |       | Microenvironment                                                                                                                                                                                         |                                            | % DEPC CL                           |                              |                               |
|--------------------|---------------------|-----------------|-----------------------|-------|----------------------------------------------------------------------------------------------------------------------------------------------------------------------------------------------------------|--------------------------------------------|-------------------------------------|------------------------------|-------------------------------|
|                    |                     |                 | %SASA ratio           | > 20% | Charged polar contact [within 4 Å]                                                                                                                                                                       | Hydrophobic neighbor [within 6 Å]          | Intact protein (DEPC:protein = 4:1) | Peptide (DEPC:peptide = 4:1) | Peptide (DEPC:peptide = 50:1) |
| S57                | Random coil         | N/A             | 34.9                  | ✓     | ✓<br>- H-bonding with side chain COOH of D59<br>- H-bonding with side chain OH of S61<br>- H-bonding with backbone CO of F56, S61<br>- H-bonding with backbone NH of K58, D59<br>- Overall: Charged, (-) | ✓<br>- OH close to F56                     | 1.8 ± 0.9                           | N.D.                         | N.D.                          |
| K58                | Random coil         | 10.29           | 88.5                  | ✓     | ✗<br>- Overall: Uncharged, nothing                                                                                                                                                                       | ✓<br>- NH <sub>2</sub> close to F56        | 9 ± 2                               | N/A                          | N/A                           |
| S61                | Random coil         | N/A             | 28.1                  | ✓     | ✓<br>- H-bonding with side chain guanidinium of R3<br>- H-bonding with backbone NH of G29, S57, F62<br>- H-bonding with backbone CO of G29, F56, S57, D58<br>- Overall: Charged, (+)                     | ✓<br>- OH close to F56, W60, F62, Y63      | 10 ± 1                              | N.D.                         | N.D.                          |
| Y63                | Random coil         | 9.54            | 27.7                  | ✓     | ✗<br>- H-bonding with side chain OH of Y26, S55<br>- Overall: Uncharged, polar contact                                                                                                                   | ✓<br>- OH close to Y26, F56                | 0.3 ± 0.2                           | N.D.                         | N.D.                          |
| Y66                | β-sheet             | 13.25           | 7.5                   | ✗     | ✗<br>- Overall: Uncharged, nothing                                                                                                                                                                       | ✓<br>- OH close to V27, F30, I35, V37, L64 | 0.3 ± 0.2                           | N.D.                         | N.D.                          |
| Y67                | β-sheet             | 10.46           | 22.8                  | ✓     | ✓<br>- H-bonding with side chain OH of S52<br>- H-bonding with backbone CO of H51<br>- H-bonding with side chain COOH of E50<br>- Overall: Charged, (-)                                                  | ✓<br>- OH close to L65                     | N.D.                                | N.D.                         | 1.3 ± 0.6                     |
| T68                | β-sheet             | N/A             | 0.1                   | ✗     | ✓<br>- H-bonding with backbone CO of K48<br>- H-bonding with backbone NH of E69<br>- H-bonding with side chain COOH of E69<br>- Overall: Charged, (-)                                                    | ✓<br>- OH close to L39, I46, V49, F70      | N.D.                                | N.D.                         | N.D.                          |

| $\beta$ 2m residue | Secondary structure | pK <sub>a</sub> | Solvent accessibility |       | Microenvironment                                                                                                                                                 |                                          | % DEPC CL                           |                              |                               |
|--------------------|---------------------|-----------------|-----------------------|-------|------------------------------------------------------------------------------------------------------------------------------------------------------------------|------------------------------------------|-------------------------------------|------------------------------|-------------------------------|
|                    |                     |                 | %SASA ratio           | > 20% | Charged polar contact [within 4 Å]                                                                                                                               | Hydrophobic neighbor [within 6 Å]        | Intact protein (DEPC:protein = 4:1) | Peptide (DEPC:peptide = 4:1) | Peptide (DEPC:peptide = 50:1) |
| T71                | Random coil         | N/A             | 29.8                  | ✓     | ✗<br>- H-bonding with side chain OH of S20<br>- H-bonding with backbone CO of E69<br>- Overall: Uncharged, polar contact                                         | ✗                                        | N.D.                                | N.D.                         | N.D.                          |
| T73                | Random coil         | N/A             | 63.9                  | ✓     | ✓<br>- H-bonding with side chain COOH of D76<br>- H-bonding with backbone NH of E74, K75, D76<br>- Overall: Charged, (-)                                         | ✗                                        | N.D.                                | N.D.                         | N.D.                          |
| K75                | Random coil         | 10.47           | 100                   | ✓     | ✓<br>- Salt bridge with side chain COOH of E74, E77<br>- Overall: Charged, (-)                                                                                   | ✗                                        | 2.3 ± 0.9                           | N/A                          | N/A                           |
| Y78                | Random coil         | 10.34           | 5.1                   | ✗     | ✓<br>- H-bonding with side chain NH <sub>2</sub> of K41<br>- H-bonding with backbone NH of T71<br>- H-bonding with backbone CO of T71<br>- Overall: Charged, (+) | ✓<br>- OH close to I46, F70              | N.D.                                | N.D.                         | N.D.                          |
| H84                | Random coil         | 5.78            | 0.0                   | ✗     | ✗<br>- H-bonding with backbone NH of T86<br>- Overall: Uncharged, polar contact                                                                                  | ✓<br>- imidazole amine close to F30, V85 | 2.0 ± 0.3                           | N/A                          | N/A                           |
| T86                | Random coil         | NA              | 9.2                   | ✗     | ✗<br>- H-bonding with backbone NH of L87<br>- H-bonding with backbone CO of V85<br>- Overall: Uncharged, polar contact                                           | ✓<br>- OH close to V85, L87              | N.D.                                | N.D.                         | N.D.                          |
| S88                | Random coil         | NA              | 96.7                  | ✓     | ✗<br>- H-bonding with backbone CO of V85<br>- Overall: Uncharged, polar contact                                                                                  | ✓<br>- OH close to L87                   | N.D.                                | N.D.                         | N.D.                          |
| K91                | Random coil         | 10.36           | 71.3                  | ✓     | ✗<br>- H-bonding with side chain CONH <sub>2</sub> of Q89<br>- H-bonding with backbone CO of I92<br>- Overall: Uncharged, polar contact                          | ✓<br>- NH <sub>2</sub> close to V93      | 4 ± 3                               | N/A                          | N/A                           |
| K94                | Random coil         | 10.56           | 80.3                  | ✓     | ✓<br>- Salt bridge with side chain COOH of E77<br>- H-bonding with backbone CO of W95<br>- Overall: Charged, (-)                                                 | ✓<br>- NH <sub>2</sub> close to I92, M99 | 6 ± 2                               | N/A                          | N/A                           |

**Table S2.** DEPC modification percentages of nucleophilic residues in ubiquitin (Ub) intact protein and its proteolytic peptides. Each experiment was performed in triplicate or quadruplicate (n = 3 or 4). Error bars shown in a table are standard deviations. Listed along are structural features of each residue from PDB 1UBQ. ✓ and ✕ represent presence or absence of each structural element, respectively. (+) and (-) represent positively charged and negatively charged polar contacts, respectively.

| Ub residue | Secondary structure | pK <sub>a</sub> <sup>†</sup> | Solvent accessibility* |       | Microenvironment                                                                                                               |                                     | % DEPC CL                           |                              |                               |
|------------|---------------------|------------------------------|------------------------|-------|--------------------------------------------------------------------------------------------------------------------------------|-------------------------------------|-------------------------------------|------------------------------|-------------------------------|
|            |                     |                              | %SASA ratio            | > 20% | Charged polar contact [within 4 Å]                                                                                             | Hydrophobic neighbor [within 6 Å]   | Intact protein (DEPC:protein = 4:1) | Peptide (DEPC:peptide = 4:1) | Peptide (DEPC:peptide = 50:1) |
| K6         | β-sheet             | 10.37                        | 59.7                   | ✓     | ✕<br>- Overall: Uncharged, nothing                                                                                             | ✕                                   | 0.8 ± 0.6                           | N/A <sup>b</sup>             | N/A                           |
| T7         | β-sheet             | N/A <sup>a</sup>             | 14.2                   | ✕     | ✕<br>- H-bonding with backbone CO of T9, K11<br>- H-bonding with backbone NH of T9, K11<br>- Overall: Uncharged, polar contact | ✓<br>- OH close to L8               | 13 ± 2                              | N.D. <sup>c</sup>            | N.D.                          |
| T9         | Random coil         | N/A                          | 85.5                   | ✓     | ✕<br>- H-bonding with side chain OH of T7<br>- Overall: Uncharged, polar contact                                               | ✕                                   | N.D.                                | N.D.                         | N.D.                          |
| K11        | β-sheet             | 11.02                        | 59.8                   | ✓     | ✓<br>- Salt bridge with side chain COOH of E34<br>- Overall: Charged, (-)                                                      | ✓<br>- NH <sub>2</sub> close to I13 | N.D.                                | N/A                          | N/A                           |
| T12        | β-sheet             | N/A                          | 39.4                   | ✓     | ✕<br>- Overall: Uncharged, nothing                                                                                             | ✕                                   | N.D.                                | N.D.                         | N.D.                          |
| T14        | β-sheet             | N/A                          | 54.8                   | ✓     | ✕<br>- Overall: Uncharged, nothing                                                                                             | ✕                                   | N.D.                                | N.D.                         | N.D.                          |
| S20        | Random coil         | N/A                          | 86.9                   | ✓     | ✕<br>- Overall: Uncharged, nothing                                                                                             | ✓<br>- OH close to P19              | N.D.                                | N.D.                         | N.D.                          |
| T22        | Random coil         | N/A                          | 46.2                   | ✓     | ✕<br>- H-bonding with backbone NH of N25<br>- Overall: Uncharged, polar contact                                                | ✕                                   | N.D.                                | N.D.                         | N.D.                          |
| K27        | α-helix             | 10.53                        | 9.8                    | ✕     | ✓<br>- Salt bridge with side chain COOH of D52<br>- H-bonding with backbone CO of Q41<br>- Overall: Charged, (-)               | ✓<br>- NH <sub>2</sub> close to I23 | N.D.                                | N/A                          | N/A                           |

<sup>a</sup> N/A = not applicable; <sup>b</sup> N-terminal blocking using SNHSA also results in side reaction (acetylation) at Lys and His residues in free peptides, so they are not discussed here.

<sup>c</sup> N.D. = not detected (less than DEPC labeling threshold of 0.01%<sup>5</sup>)

\* SASA calculated using GETAREA<sup>4</sup>, as explained in detail in the Supplemental Experimental Section; <sup>†</sup> pK<sub>a</sub> calculated using PROPKA<sup>6</sup>

| Ub residue | Secondary structure | pK <sub>a</sub> | Solvent accessibility |       | Microenvironment                                                                                                         |                                          | % DEPC CL                           |                              |                               |
|------------|---------------------|-----------------|-----------------------|-------|--------------------------------------------------------------------------------------------------------------------------|------------------------------------------|-------------------------------------|------------------------------|-------------------------------|
|            |                     |                 | %SASA ratio           | > 20% | Charged polar contact [within 4 Å]                                                                                       | Hydrophobic neighbor [within 6 Å]        | Intact protein (DEPC:protein = 4:1) | Peptide (DEPC:peptide = 4:1) | Peptide (DEPC:peptide = 50:1) |
| K29        | α-helix             | 10.40           | 37.3                  | ✓     | ✗<br>- H-bonding with backbone CO of E16<br>- Overall: Uncharged, polar contact                                          | ✓<br>- NH <sub>2</sub> close to V17      | N.D.                                | N/A                          | N/A                           |
| K33        | α-helix             | 10.27           | 49.4                  | ✓     | ✗<br>- H-bonding with backbone CO of T14<br>- Overall: Uncharged, polar contact                                          | ✓<br>- NH <sub>2</sub> close to I13, L15 | 20 ± 6                              | N/A                          | N/A                           |
| K48        | Random coil         | 10.31           | 56.1                  | ✓     | ✗<br>- H-bonding with backbone CO of A46<br>- Overall: Uncharged, polar contact                                          | ✓<br>- NH <sub>2</sub> close to A46      | 11 ± 4                              | N/A                          | N/A                           |
| T55        | Random coil         | N/A             | 32.3                  | ✓     | ✗<br>- H-bonding with side chain OH of S57<br>- H-bonding with backbone NH of D58<br>- Overall: Uncharged, polar contact | ✗                                        | N.D.                                | N.D.                         | N.D.                          |
| S57        | α-helix             | N/A             | 59.6                  | ✓     | ✗<br>- H-bonding with side chain OH of T55<br>- H-bonding with backbone CO of P19<br>- Overall: Uncharged, polar contact | ✗                                        | N.D.                                | N.D.                         | N.D.                          |
| Y59        | α-helix             | 9.98            | 12.9                  | ✗     | ✗<br>- H-bonding with backbone NH of E51<br>- Overall: Uncharged, polar contact                                          | ✓<br>- OH close to L50                   | N.D.                                | N.D.                         | N.D.                          |
| K63        | Random coil         | 10.66           | 74.3                  | ✓     | ✗<br>- Overall: Uncharged, nothing                                                                                       | ✗                                        | 0.31 ± 0.08                         | N/A                          | N/A                           |
| S65        | β-sheet             | N/A             | 9.2                   | ✗     | ✗<br>- H-bonding with backbone CO of Q62<br>- H-bonding with backbone NH of Q62<br>- Overall: Uncharged, polar contact   | ✓<br>- OH close to F45, I61              | 2.4 ± 0.2                           | N.D.                         | N.D.                          |
| T66        | β-sheet             | N/A             | 40.1                  | ✓     | ✗<br>- Overall: Uncharged, nothing                                                                                       | ✓<br>- OH close to F4                    | N.D.                                | N.D.                         | N.D.                          |
| H68        | β-sheet             | 6.00            | 49.1                  | ✓     | ✗<br>- Overall: Uncharged, nothing                                                                                       | ✓<br>- NH close to I44                   | 2.7 ± 0.5                           | N/A                          | N/A                           |

**Table S3.** DEPC modification percentages of nucleophilic residues in hGH intact protein and its proteolytic peptides. Each experiment was performed in triplicate or quadruplicate (n = 3 or 4). Error bars shown in a table are standard deviations. Listed along are structural features of each residue from PDB 1HGU. ✓ and ✗ represent presence or absence of each structural element, respectively. (+) and (-) represent positively charged and negatively charged polar contacts, respectively.

| hGH residue | Secondary structure                                        | pK <sub>a</sub>  | Solvent accessibility |       | Microenvironment                                                                                                       |                                           | % DEPC CL                           |                              |                               |
|-------------|------------------------------------------------------------|------------------|-----------------------|-------|------------------------------------------------------------------------------------------------------------------------|-------------------------------------------|-------------------------------------|------------------------------|-------------------------------|
|             |                                                            |                  | %SASA ratio           | > 20% | Charged polar contact [within 4 Å]                                                                                     | Hydrophobic neighbor [within 6 Å]         | Intact protein (DEPC:protein = 5:1) | Peptide (DEPC:peptide = 5:1) | Peptide (DEPC:peptide = 50:1) |
| T4          | Random coil                                                | N/A <sup>a</sup> | 100                   | ✓     | ✗<br>- Overall: Uncharged, nothing                                                                                     | ✓<br>- OH close to P3                     | N.D. <sup>c</sup>                   | N.D.                         | N.D.                          |
| S8          | α-helix                                                    | N/A              | 40.3                  | ✓     | ✗<br>- Overall: Uncharged, nothing                                                                                     | ✓<br>- OH close to V186                   | N.D.                                | N.D.                         | N.D.                          |
| H19         | α-helix                                                    | 4.78             | 37.2                  | ✓     | ✗<br>- Overall: Uncharged, nothing                                                                                     | ✓<br>- imidazole amine close to M15       | 1.3 ± 0.8 (H19/H22)                 | N/A <sup>b</sup>             | N/A                           |
| H22         | α-helix                                                    | 5.16             | 24.0                  | ✓     | ✗<br>- Overall: Uncharged, nothing                                                                                     | ✓<br>- imidazole amine close to F26, M171 |                                     | N/A                          | N/A                           |
| T28         | α-helix                                                    | N/A              | 10.7                  | ✗     | ✓<br>- H-bonding with side chain COOH of D27<br>- H-bonding with backbone CO of L24<br>- Overall: Charged, (-)         | ✓<br>- OH close to L24                    | 1.3 ± 0.6                           | N.D.                         | N.D.                          |
| Y29         | α-helix                                                    | 13.59            | 4.1                   | ✗     | ✓<br>- H-bonding with side chain NH <sub>2</sub> of K42<br>- Overall: Charged, (+)                                     | ✓<br>- OH close to Y161                   | 0.2 ± 0.1                           | N.D.                         | N.D.                          |
| Y36         | α-helix                                                    | 10.35            | 37.2                  | ✓     | ✗<br>- Overall: Uncharged, nothing                                                                                     | ✓<br>- OH close to F32                    | 0.4 ± 0.3                           | N.D.                         | N.D.                          |
| K39         | No information from a crystal structure about this residue |                  |                       |       |                                                                                                                        |                                           | 0.06 ± 0.01                         | N/A                          | N/A                           |
| K42         | Random coil                                                | 11.22            | 36.2                  | ✓     | ✗<br>- H-bonding with side chain OH of Y28<br>- Overall: Uncharged, polar contact                                      | ✗                                         | 0.07 ± 0.02                         | N/A                          | N/A                           |
| Y43         | Random coil                                                | 10.05            | 87.7                  | ✓     | ✗<br>- Overall: Uncharged, nothing                                                                                     | ✗                                         | N.D.                                | N.D.                         | N.D.                          |
| S44         | Random coil                                                | N/A              | 37.0                  | ✓     | ✗<br>- H-bonding with backbone CO of Q41<br>- H-bonding with backbone NH of F45<br>- Overall: Uncharged, polar contact | ✓<br>- OH close to F45, L46               | N.D.                                | N.D.                         | N.D.                          |

<sup>a</sup> N/A = not applicable; <sup>b</sup> N-terminal blocking using SNHSA also results in side reaction (acetylation) at Lys and His residues in free peptides, so they are not discussed here.  
<sup>c</sup> N.D. = not detected (less than DEPC labeling threshold of 0.01%<sup>5</sup>)  
\* SASA calculated using GETAREA<sup>4</sup>, as explained in detail in the Supplemental Experimental Section; <sup>†</sup> pK<sub>a</sub> calculated using PROPKA<sup>6</sup>

| hGH residue | Secondary structure                                        | pK <sub>a</sub> | Solvent accessibility |       | Microenvironment                                                                                                           |                                     | % DEPC CL                           |                              |                               |
|-------------|------------------------------------------------------------|-----------------|-----------------------|-------|----------------------------------------------------------------------------------------------------------------------------|-------------------------------------|-------------------------------------|------------------------------|-------------------------------|
|             |                                                            |                 | %SASA ratio           | > 20% | Charged polar contact [within 4 Å]                                                                                         | Hydrophobic neighbor [within 6 Å]   | Intact protein (DEPC:protein = 5:1) | Peptide (DEPC:peptide = 5:1) | Peptide (DEPC:peptide = 50:1) |
| T51         | No information from a crystal structure about this residue |                 |                       |       |                                                                                                                            |                                     | N.D.                                | N.D.                         | N.D.                          |
| S52         | Random coil                                                | N/A             | 65.5                  | ✓     | ✗<br>- H-bonding with backbone CO, NH of L53<br>- Overall: Uncharged, polar contact                                        | ✗                                   | N.D.                                | N.D.                         | N.D.                          |
| S56         | Random coil                                                | N/A             | 20.8                  | ✓     | ✗<br>- H-bonding with backbone CO of L53<br>- Overall: Uncharged, polar contact                                            | ✓<br>- OH close to L53              | 0.02 ± 0.01                         | N.D.                         | N.D.                          |
| S58         | Random coil                                                | N/A             | 3.3                   | ✗     | ✗<br>- H-bonding with backbone CO, NH of I59<br>- H-bonding with backbone CO of F55<br>- Overall: Uncharged, polar contact | ✓<br>- OH close to F177             | 64 ± 4                              | N.D.                         | N.D.                          |
| T61         | Random coil                                                | N/A             | 38.7                  | ✓     | ✓<br>- H-bonding with side chain NH <sub>2</sub> of K73<br>- Overall: Charged, (+)                                         | ✓<br>- OH close to P62, F177        | N.D.                                | N.D.                         | N.D.                          |
| S63         | Random coil                                                | N/A             | 17.6                  | ✗     | ✗<br>- H-bonding with backbone CO of P62<br>- Overall: Uncharged, polar contact                                            | ✓<br>- OH close to F177             | N.D.                                | N.D.                         | N.D.                          |
| T68         | No information from a crystal structure about this residue |                 |                       |       |                                                                                                                            |                                     | N.D.                                | N.D.                         | N.D.                          |
| K71         | Random coil                                                | 10.04           | 27.1                  | ✓     | ✗<br>- H-bonding with backbone CO of Q69<br>- Overall: Uncharged, polar contact                                            | ✓<br>- NH <sub>2</sub> close to I59 | N.D.                                | N/A                          | N/A                           |
| S72         | Random coil                                                | N/A             | 32.2                  | ✓     | ✗<br>- H-bonding with backbone NH of L74<br>- Overall: Uncharged, polar contact                                            | ✓<br>- OH close to L74              | N.D.                                | N.D.                         | N.D.                          |
| S80         | α-helix                                                    | N/A             | 0.5                   | ✗     | ✗<br>- H-bonding with backbone CO of L76<br>- Overall: Uncharged, polar contact                                            | ✓<br>- OH close to L83, V174, L178, | N.D.                                | N.D.                         | N.D.                          |
| S86         | α-helix                                                    | N/A             | 0.1                   | ✗     | ✗<br>- H-bonding with backbone CO of Y144<br>- Overall: Uncharged, polar contact                                           | ✓<br>- OH close to F55, W87         | N.D.                                | N.D.                         | N.D.                          |
| S96         | Random coil                                                | N/A             | 49.7                  | ✓     | ✗<br>- Overall: Uncharged, nothing                                                                                         | ✗                                   | N.D.                                | N.D.                         | N.D.                          |

| hGH residue | Secondary structure | pK <sub>a</sub> | Solvent accessibility |       | Microenvironment                                                                 |                                           | % DEPC CL                           |                              |                               |
|-------------|---------------------|-----------------|-----------------------|-------|----------------------------------------------------------------------------------|-------------------------------------------|-------------------------------------|------------------------------|-------------------------------|
|             |                     |                 | %SASA ratio           | > 20% | Charged polar contact [within 4 Å]                                               | Hydrophobic neighbor [within 6 Å]         | Intact protein (DEPC:protein = 5:1) | Peptide (DEPC:peptide = 5:1) | Peptide (DEPC:peptide = 50:1) |
| S101        | Random coil         | N/A             | 33.4                  | ✓     | ✗<br>- H-bonding with backbone CO of V103<br>- Overall: Uncharged, polar contact | ✗                                         | N.D.                                | N.D.                         | N.D.                          |
| Y104        | Random coil         | 10.05           | 82.5                  | ✓     | ✗<br>- Overall: Uncharged, nothing                                               | ✗                                         | N.D.                                | N.D.                         | N.D.                          |
| S107        | Random coil         | N/A             | 26.1                  | ✓     | ✓<br>- H-bonding with side chain guanidinium of R20<br>- Overall: Charged, (+)   | ✓<br>- OH close to L24                    | N.D.                                | N.D.                         | 0.19 ± 0.12                   |
| S109        | Random coil         | N/A             | 49.3                  | ✓     | ✓<br>- H-bonding with sidechain COOH of D106<br>- Overall: Charged, (-)          | ✗                                         | N.D.                                | N.D.                         | N.D.                          |
| Y112        | α-helix             | 10.38           | 29.9                  | ✓     | ✗<br>- Overall: Uncharged, nothing                                               | ✗                                         | N.D.                                | N.D.                         | N.D.                          |
| K116        | α-helix             | 10.63           | 40.9                  | ✓     | ✗<br>- Overall: Uncharged, nothing                                               | ✓<br>- NH <sub>2</sub> close to L88, Y112 | N.D.                                | N/A                          | N/A                           |
| T124        | α-helix             | N/A             | 47.2                  | ✓     | ✗<br>- Overall: Uncharged, nothing                                               | ✓<br>- OH close to L10                    | N.D.                                | N.D.                         | N.D.                          |
| S133        | Random coil         | N/A             | 80.2                  | ✓     | ✗<br>- H-bonding with backbone CO of G132<br>- Overall: Uncharged, polar contact | ✗                                         | N.D.                                | N.D.                         | N.D.                          |
| T136        | Random coil         | N/A             | 35.9                  | ✓     | ✓<br>- H-bonding with side chain guanidinium of R78<br>- Overall: Charged, (+)   | ✓<br>- OH close to L74                    | 0.15 ± 0.09                         | 0.1 ± 0.1                    | 0.08 ± 0.02                   |
| K141        | Random coil         | 10.42           | 90.5                  | ✓     | ✗<br>- Overall: Uncharged, nothing                                               | ✗                                         | 18 ± 8                              | N/A                          | N/A                           |
| T143        | Random coil         | N/A             | 96.4                  | ✓     | ✗<br>- Overall: Uncharged, nothing                                               | ✓<br>- OH close to A145                   | N.D.                                | N.D.                         | N.D.                          |
| Y144        | Random coil         | 10.41           | 31.1                  | ✓     | ✗<br>- Overall: Uncharged, nothing                                               | ✓<br>- OH close to L82                    | 0.66 ± 0.05                         | N.D.                         | 0.02 ± 0.03                   |

| hGH residue | Secondary structure                                        | pK <sub>a</sub> | Solvent accessibility |       | Microenvironment                                                                                                           |                                          | % DEPC CL                           |                              |                               |
|-------------|------------------------------------------------------------|-----------------|-----------------------|-------|----------------------------------------------------------------------------------------------------------------------------|------------------------------------------|-------------------------------------|------------------------------|-------------------------------|
|             |                                                            |                 | %SASA ratio           | > 20% | Charged polar contact [within 4 Å]                                                                                         | Hydrophobic neighbor [within 6 Å]        | Intact protein (DEPC:protein = 5:1) | Peptide (DEPC:peptide = 5:1) | Peptide (DEPC:peptide = 50:1) |
| S145        | No information from a crystal structure about this residue |                 |                       |       |                                                                                                                            |                                          | N.D.                                | N.D.                         | N.D.                          |
| K146        | Random coil                                                | 9.4             | 1.1                   | ✗     | ✗<br>- Overall: Uncharged, nothing                                                                                         | ✓<br>- NH <sub>2</sub> close to L53, F55 | 0.09 ± 0.08                         | N/A                          | N/A                           |
| T149        | No information from a crystal structure about this residue |                 |                       |       |                                                                                                                            |                                          | N.D.                                | N.D.                         | N.D.                          |
| S151        | Random coil                                                | N/A             | 56.7                  | ✓     | ✗<br>- H-bonding with backbone CO of N150<br>- Overall: Uncharged, polar contact                                           | ✗                                        | N.D.                                | N.D.                         | N.D.                          |
| H152        | Random coil                                                | 6.38            | 84.4                  | ✓     | ✗<br>- Overall: Uncharged, nothing                                                                                         | ✗                                        | N.D.                                | N/A                          | N/A                           |
| K159        | α-helix                                                    | 11.43           | 70.9                  | ✓     | ✓<br>- Salt bridge with sidechain COOH of E34<br>- Overall: Charged, (-)                                                   | ✗                                        | N.D.                                | N/A                          | N/A                           |
| Y161        | α-helix                                                    | 11.14           | 10.0                  | ✗     | ✗<br>- Overall: Uncharged, nothing                                                                                         | ✓<br>- OH close to L46                   | N.D.                                | N.D.                         | N.D.                          |
| T165        | No information from a crystal structure about this residue |                 |                       |       |                                                                                                                            |                                          | N.D.                                | N.D.                         | N.D.                          |
| K169        | α-helix                                                    | 10.00           | 42.8                  | ✓     | ✗<br>- Overall: Uncharged, nothing                                                                                         | ✗                                        | N.D.                                | N/A                          | N/A                           |
| K173        | α-helix                                                    | 8.71            | 1.4                   | ✗     | ✗<br>- H-bonding with backbone CO of K169<br>- Overall: Uncharged, polar contact                                           | ✓<br>- NH <sub>2</sub> close to F55      | 5.0 ± 0.4                           | N/A                          | N/A                           |
| T176        | α-helix                                                    | N/A             | 19.0                  | ✗     | ✓<br>- H-bonding with sidechain NH <sub>2</sub> of R179<br>- H-bonding with backbone CO of D172<br>- Overall: Charged, (+) | ✗                                        | N.D.                                | N.D.                         | N.D.                          |
| S185        | Random coil                                                | N/A             | 24.0                  | ✓     | ✗<br>- H-bonding with backbone CO of V181<br>- Overall: Uncharged, polar contact                                           | ✓<br>- OH close to F11                   | N.D.                                | N.D.                         | N.D.                          |
| S189        | Random coil                                                | N/A             | 96.1                  | ✓     | ✗<br>- Overall: Uncharged, nothing                                                                                         | ✗                                        | N.D.                                | N.D.                         | N.D.                          |



## SUPPLEMENTAL REFERENCES

1. Verdone, G.; Corazza, A.; Viglino, P.; Pettirossi, F.; Giorgetti, S.; Mangione, P.; Andreola, A.; Stoppini, M.; Bellotti, V.; Esposito, G., The solution structure of human  $\beta$ 2-microglobulin reveals the prodromes of its amyloid transition. *Protein Sci.* **2002**, *11* (3), 487-499.
2. Vijay-Kumar, S.; Bugg, C. E.; Cook, W. J., Structure of ubiquitin refined at 1.8 Å resolution. *J. Mol. Biol.* **1987**, *194* (3), 531-544.
3. Chantalat, L.; Jones, N. D.; Korber, F.; Navaza, J.; Pavlovsky, A. G., The Crystal Structure of Wild-type Growth Hormone at 2.5 Å Resolution. *Protein Pept. Lett.* **1995**, *2* (2), 333-340.
4. Fraczekiewicz, R.; Braun, W., Exact and efficient analytical calculation of the accessible surface areas and their gradients for macromolecules. *J. Comput. Chem.* **1998**, *19* (3), 319-333.
5. Limpikirati, P.; Hale, J. E.; Hazelbaker, M.; Huang, Y.; Jia, Z.; Yazdani, M.; Graban, E. M.; Vaughan, R. C.; Vachet, R. W., Covalent labeling and mass spectrometry reveal subtle higher order structural changes for antibody therapeutics. *mAbs* **2019**, *11* (3), 463-476.
6. Li, H.; Robertson, A. D.; Jensen, J. H., Very fast empirical prediction and rationalization of protein pKa values. *Proteins: Struct., Funct., Bioinf.* **2005**, *61* (4), 704-721.
